# Supplementary material for: The Impact of Glucose Oxidase Immobilization on Dendritic Gold Nanostructures on the Performance of Glucose Biosensors
Source: MDPI journal article supplement (doi:10.3390/bios12050320), 2022-05-10
Supplement: s1 [file s1]

*Supplementary Material*

# The Impact of Glucose Oxidase Immobilization on Dendritic Gold Nanostructures on the Performance of Glucose Biosensors

Laura Sakalauskienė <sup>1</sup>, Anton Popov <sup>1,2</sup>, Asta Kausaite-Minkstienė <sup>1,2</sup>, Arunas Ramanavicius <sup>1</sup>  
and Almira Ramanaviciene <sup>1,2,\*</sup>

<sup>1</sup> NanoTechnas—Center of Nanotechnology and Materials Science, Institute of Chemistry, Faculty of Chemistry and Geosciences, Vilnius University, Naugarduko st. 24, LT-03225 Vilnius, Lithuania; laura.sakalauskienė@chgf.vu.lt (L.S.); anton.popov@chgf.vu.lt (A.P.); asta.kausaitė@chf.vu.lt (A.K.-M.); arunas.ramanavicius@chf.vu.lt (A.R.)

<sup>2</sup> Department of Immunology, State Research Institute Centre for Innovative Medicine, Santariskiu st. 5, LT-08406 Vilnius, Lithuania

\* Correspondence: almira.ramanaviciene@chf.vu.lt

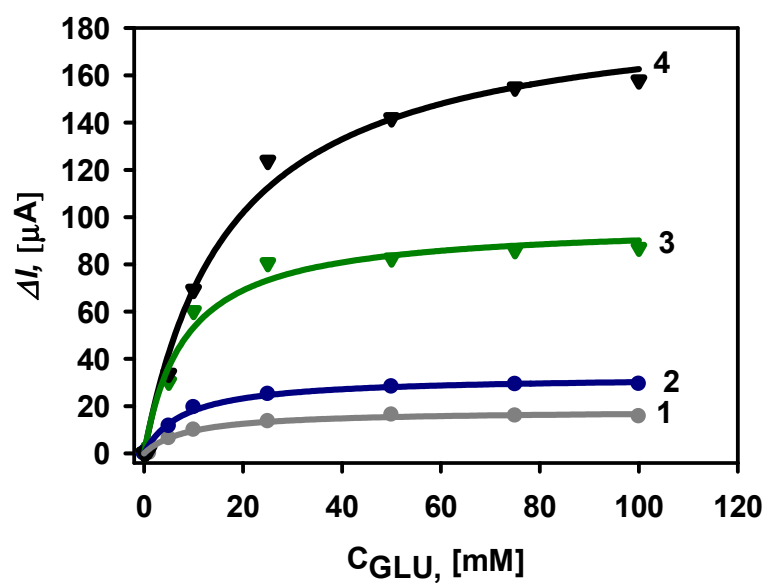

**Figure S1.** Calibration plots of glucose biosensors based on GA-GOx-SAM/DGNs/GR electrode without additional cross-linking with 25% glutaraldehyde vapour (curve 1), and after cross-linking for 3 min (curve 2), 10 min (curve 3) and 15 min (curve 4). The amperometric response at +0.3 V was registered in 0.05 M SA buffer with 0.1 M KCl (pH 6.0) in the presence of 2.0 mM PMS.

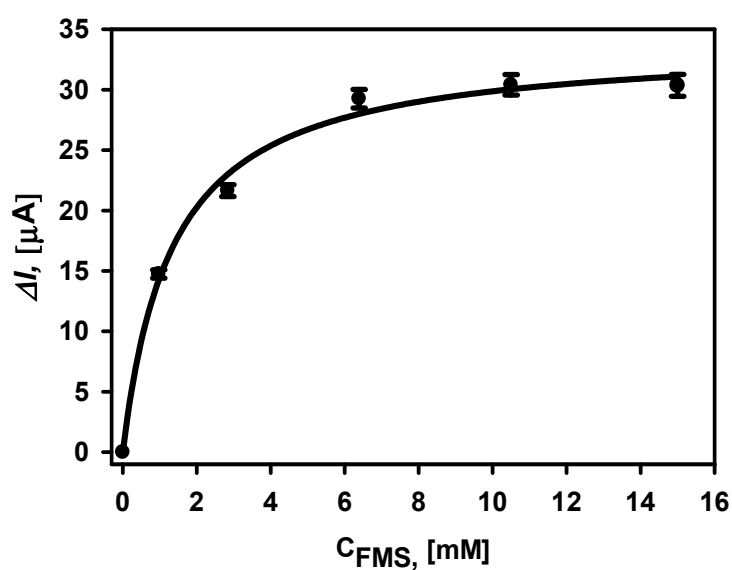

**Figure S2.** Selection of the optimal concentration of redox mediator PMS. Experiments were performed using GA-GOx-SAM/DGNs/GR electrode. The amperometric response at +0.3 V was registered in 0.05 M SA buffer with 0.1 M KCl (pH 6.0).

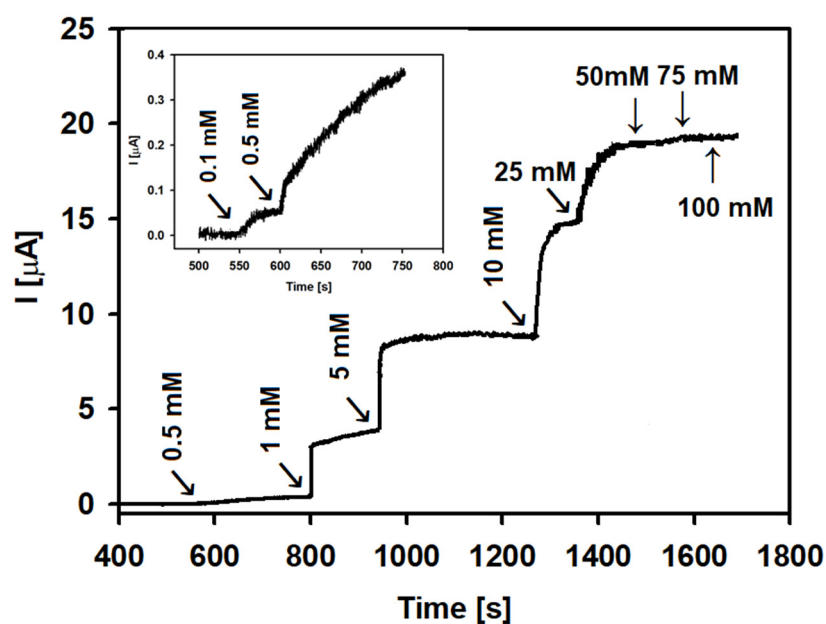

**Figure S3.** The amperogram of biosensor based on GOx/SAM/DGNs/GR electrode after addition of glucose. The current response was registered at +0.3 V in 0.05 M SA buffer with 0.1 M KCl (pH 6.0) in the presence of 6.0 mM PMS.

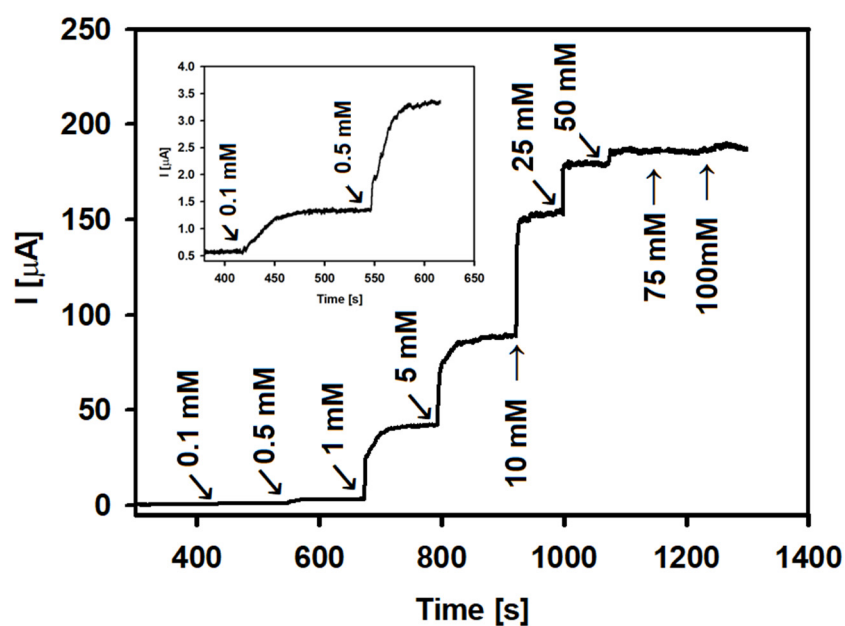

**Figure S4.** The amperogram of biosensor based on GA-GOx/DGNs/GR electrode after addition of glucose. The current response was registered at +0.3 V in 0.05 M SA buffer with 0.1 M KCl (pH 6.0) in the presence of 6.0 mM PMS.

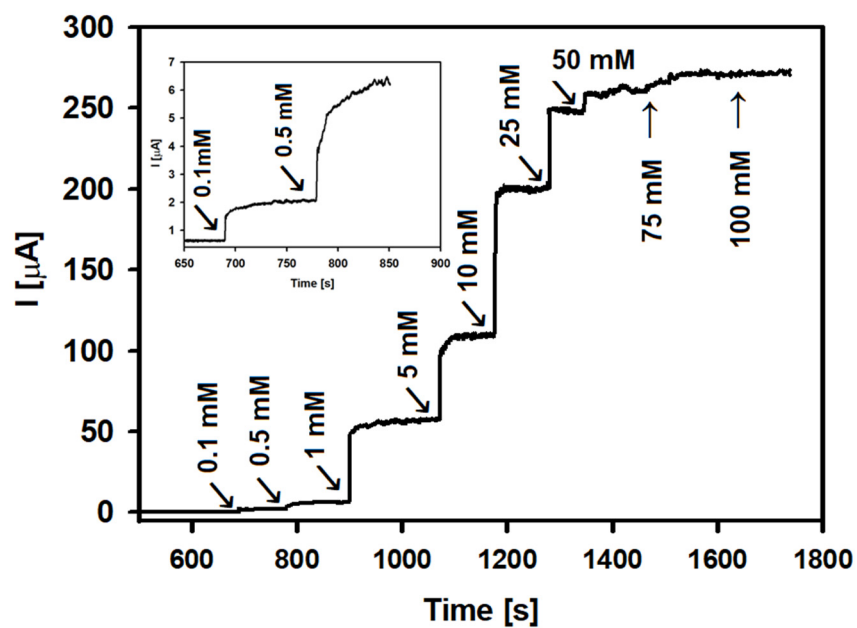

**Figure S5.** The amperogram of biosensor based on GA-GOx/SAM/DGNs/GR electrode after addition of glucose. The current response was registered at +0.3 V in 0.05 M SA buffer with 0.1 M KCl (pH 6.0) in the presence of 6.0 mM PMS.
